# Supplementary material for: Establishing a Receptor Binding Assay for Ciguatoxins: Challenges, Assay Performance and Application
Source: MDPI journal article supplement (doi:10.3390/toxins16010060), 2024-01-22
Supplement: s1 [file s1]

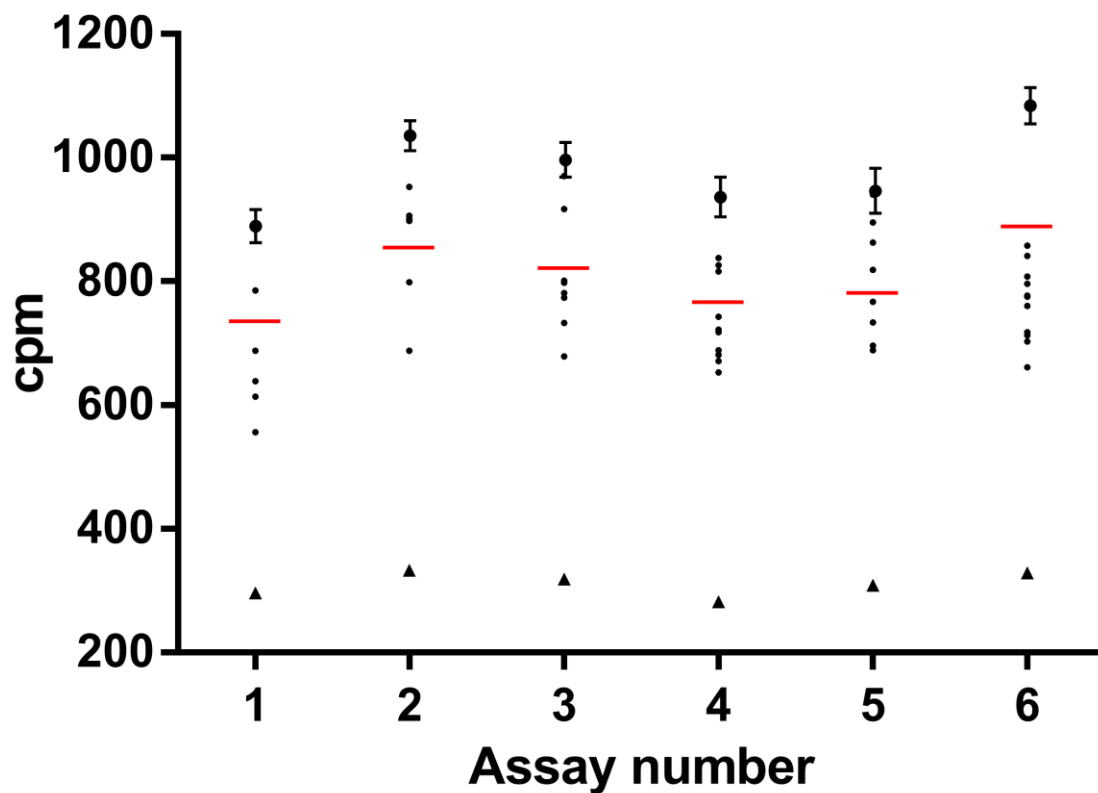

Figure S1. Examples of quantified counts per minute (cpm) values for different dilutions of the fish extracts (small black circles), with a distinction between values below ( $RBA^+$ ) and above ( $RBA^-$ ) the  $EC_{80}$  marked by horizontal red lines for six separate RBA experiments. The  $EC_{20}$  for each individual experiment is indicated by black solid triangles and the maximum binding values are reported (bigger black circles) with their corresponding standard deviations.
